# Supplementary material
Source: Springer Nature journal article supplement (https://www.springermedizin.de/resource/supplementary/12890_2006_62_MOESM1_ESM.pdf/9505888)
Supplement: MOESM1 [file 9505888]

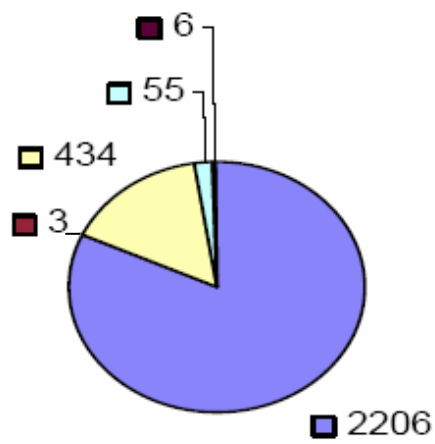

- No stage or stage 0 (At Risk)
- Stage 1 (Mild COPD)
- Stage 2 (Moderate COPD)
- Stage 3 (Severe COPD)
- Stage 4 (Very Severe COPD)
